# Supplementary material for: Efficient registering of color and range images
Source: Springer Nature journal article supplement (doi:10.1186/1687-5281-2013-41), 2013-07-19

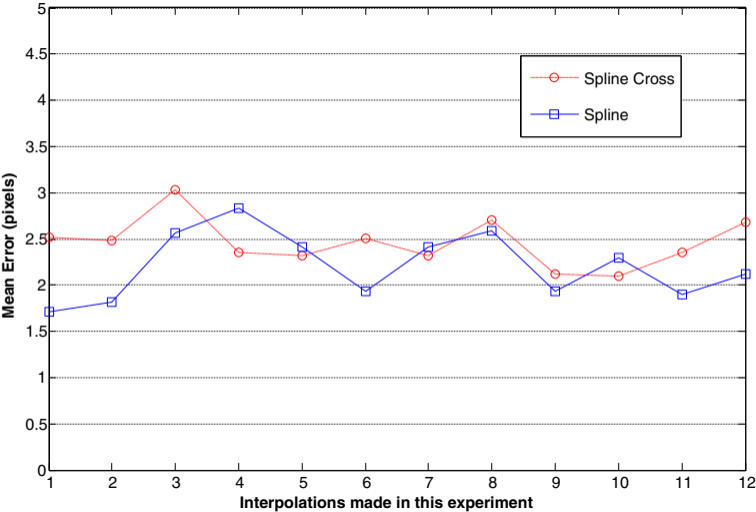

Supplement: 13640_2012_80_MOESM7_ESM.pdf [file 13640_2012_80_MOESM7_ESM.pdf]
